# Supplementary material
Source: publisher figshare collection journal article supplement (https://future-science-group.figshare.com/ndownloader/files/31161001)
Supplement: Supplementary file 1 [file 31161001]

**Supplementary Table S1.** Fst p-values (above diagonal) and Fst genetic distances (below diagonal) among 10 populations for the *SLCO1B1* gene variant rs2306283 .

|  | **Mexican Mestizos** | |  | **Mexican Native Americas** | | |  | **Latinamericans** | | | | |
| --- | --- | --- | --- | --- | --- | --- | --- | --- | --- | --- | --- | --- |
|  | Mestizo  YUC | Mestizo  JAL |  | Tarahumara | Nahua | Maya |  | Brazilean  1 | Brazilean  2 | Brazilean  3 | Chilean | Caucasian  USA |
| MestizoYUC | ****** | **0.0000** |  | 0.1171 | 0.0270 | 0.1622 |  | 0.0901 | 0.6396 | 0.1171 | 0.6216 | **0.0000** |
| MestizoJAL | 0.0566 | ****** |  | **0.0000** | 0.6847 | 0.0901 |  | 0.0180 | **0.0000** | **0.0000** | **0.0000** | 0.7838 |
| Tarahumara | 0.0131 | 0.1379 |  | ****** | **0.0000** | **0.0000** |  | **0.0000** | 0.1081 | 0.7027 | 0.0090 | **0.0000** |
| Nahua | 0.0389 | -0.0054 |  | 0.1125 | ****** | 0.2883 |  | 0.0451 | **0.0000** | **0.0000** | 0.0090 | 0.7568 |
| Maya | 0.0094 | 0.0095 |  | 0.0631 | 0.0009 | ****** |  | 0.8108 | 0.0360 | **0.0000** | 0.2432 | 0.0721 |
| Brazilean1 | 0.0088 | 0.0156 |  | 0.0569 | 0.0062 | -0.0040 |  | ****** | **0.0000** | **0.0000** | 0.1532 | **0.0000** |
| Brazilean2 | -0.0036 | 0.0714 |  | 0.0091 | 0.0526 | 0.0193 |  | 0.0178 | ****** | 0.0541 | 0.0991 | **0.0000** |
| Brazilean3 | 0.0072 | 0.1192 |  | -0.0029 | 0.0958 | 0.0505 |  | 0.0457 | 0.0051 | ****** | 0.0090 | **0.0000** |
| Chilean | -0.0036 | 0.0392 |  | 0.0276 | 0.0245 | 0.0019 |  | 0.0025 | 0.0019 | 0.0195 | ****** | **0.0000** |
| CaucasianUSA | 0.0534 | -0.0035 |  | 0.1270 | -0.0031 | 0.0095 |  | 0.0153 | 0.0672 | 0.1099 | 0.0372 | ****** |

JAL= Jalisco State (West, Mexico)

YUC= Yucatan State (Southeast, Mexico)

BR= Brazilian
